# Supplementary material
Source: publisher figshare collection journal article supplement (https://asha.figshare.com/articles/dataset/_/21579171)
Supplement: Supplementary file 2 [file 1]

**Supplemental Material S1.** Demographic information of the CI users.

**Table S1.** Demographic information of the CI users considered in this study

| ID  | Gender | Age | Length<br>of use | Side of use | Device<br>manufacturer | Implant type              |
|-----|--------|-----|------------------|-------------|------------------------|---------------------------|
| S1  | M      | 51  | 3                | Left        | Med-EI                 | FlexSoft                  |
| S2  | F      | 56  | 3                | Right       | Med-EI                 | Flex28                    |
| S3  | F      | 54  | 4                | Bilateral   | Med-EI                 | Flex28 (L&R)              |
| S4  | F      | 79  | 1                | Left        | Med-EI                 | Flex28                    |
| S5  | F      | 50  | 0                | Left        | Med-EI                 | Flex28                    |
| S6  | F      | 52  | 23               | Right       | Cochlear               | CI22M                     |
| S7  | M      | 52  | 3                | Right       | Med-EI                 | Flex28                    |
| S8  | F      | 73  | 4                | Right       | Med-EI                 | Flex28                    |
| S9  | M      | 60  | 6                | Bilateral   | Cochlear               | CI24RECA (R & L)          |
| S10 | M      | 79  | 2                | Right       | Med-EI                 | Flex28                    |
| S11 | M      | 73  | 1                | Bilateral   | Med-EL                 | Standard (R & L)          |
| S12 | M      | 78  | 1                | Right       | Med-EI                 | Standard                  |
| S13 | F      | 69  | 2                | Left        | Med-EI                 | Flex28                    |
| S14 | F      | 66  | 2                | Right       | Med-EI                 | FlexSoft                  |
| S15 | M      | 61  | 1                | Left        | Med-EI                 | Flex28                    |
| S16 | M      | 52  | 4                | Left        | Med-EI                 | Flex28                    |
| S17 | F      | 66  | 9                | Bilateral   | Cochlear               | CI522 (R) & CI24RECA (L)  |
| S18 | M      | 78  | 12               | Bilateral   | Med-EI                 | Standard (R & L)          |
| S19 | F      | 57  | 15               | Right       | Med-EI                 | Standard                  |
| S20 | F      | 78  | 3                | Right       | Med-EI                 | Standard                  |
| S21 | F      | 67  | 3                | Right       | Cochlear               | CI522                     |
| S22 | M      | 72  | 8                | Left        | Med-EI                 | Standard                  |
| S23 | M      | 68  | 5                | Right       | Cochlear               | CI422                     |
| S24 | F      | 78  | 1                | Left        | Med-EI                 | Standard                  |
| S25 | F      | 57  | 2                | Right       | Med-EI                 | Flex28                    |
| S26 | M      | 62  | 0                | Left        | Med-EI                 | Standard                  |
| S27 | M      | 76  | 4                | Left        | Med-EI                 | Flex28                    |
| S28 | M      | 75  | 0                | Right       | Med-EI                 | FlexSoft                  |
| S29 | F      | 70  | 7                | Bilateral   | Med-EI                 | Standard (R & L)          |
| S30 | M      | 70  | 4                | Right       | Med-EI                 | Flex28                    |
| S31 | M      | 56  | 1                | Left        | Med-EI                 | Flex28                    |
| S32 | F      | 60  | 7                | Bilateral   | Med-EI                 | Flex28                    |
| S33 | F      | 73  | 3                | Right       | Med-EI                 | Flex28                    |
| S34 | F      | 59  | 1                | Left        | Med-EI                 | FlexSoft                  |
| S35 | M      | 52  | 28               | Bilateral   | Cochlear               | CI22M (R) & CI522 (L)     |
| S36 | F      | 59  | 3                | Left        | Med-EI                 | Flex28                    |
| S37 | F      | 54  | 3                | Left        | Med-EI                 | Standard                  |
| S38 | F      | 80  | 7                | Right       | Cochlear               | CI24RECA                  |
| S39 | F      | 59  | 6                | Bilateral   | Med-EI                 | FlexSoft (R) & Flex28 (L) |
| S40 | M      | 61  | 3                | Left        | Med-EI                 | Flex28                    |
| S41 | M      | 67  | 6                | Bilateral   | Med-EI                 | FlexSoft                  |
| S42 | M      | 77  | 7                | Bilateral   | Med-EI                 | FlexSoft (R & L)          |

|     |   |    |    |           |          |                           |
|-----|---|----|----|-----------|----------|---------------------------|
| S43 | M | 57 | 7  | Bilateral | Med-EI   | Standard (R) & Flex28 (L) |
| S44 | F | 78 | 1  | Left      | Med-EI   | Flex28                    |
| S45 | F | 51 | 1  | Bilateral | Med-EI   | Flex28                    |
| S46 | F | 74 | 6  | Right     | Med-EI   | Standard                  |
| S47 | F | 61 | 1  | Right     | Med-EI   | Standard                  |
| S48 | F | 71 | 1  | Right     | Med-EI   | Flex28                    |
| S49 | F | 66 | 5  | Right     | Med-EI   | Standard                  |
| S50 | M | 83 | 18 | Bilateral | Cochlear | CI24RECA (R & L)          |
| S51 | M | 61 | 4  | Left      | Med-EI   | Standard                  |
| S52 | M | 72 | 4  | Left      | Med-EI   | FlexSoft                  |
| S53 | F | 60 | 4  | Left      | Med-EI   | Flex28                    |
| S54 | F | 80 | 4  | Left      | Cochlear | CI522                     |
| S55 | M | 64 | 10 | Bilateral | Med-EI   | FlexSoft (R & L)          |
| S56 | M | 73 | 3  | Left      | Cochlear | CI522                     |
| S57 | F | 60 | 2  | Left      | Med-EI   | Flex28                    |
| S58 | M | 53 | 2  | Left      | Med-EI   | Flex28                    |
| S59 | F | 77 | 1  | Right     | Med-EI   | Flex28                    |
| S60 | M | 56 | 2  | Bilateral | Med-EI   | Standard (R & L)          |
| S61 | M | 77 | 2  | Right     | Med-EI   | Flex28                    |
| S62 | F | 70 | 2  | Right     | Med-EI   | FlexSoft                  |
| S63 | F | 64 | 0  | Right     | Med-EI   | FlexSoft                  |
| S64 | M | 76 | 0  | Left      | Med-EI   | Standard                  |
| S65 | M | 59 | 1  | Bilateral | Med-EI   | FlexSoft (R & L)          |
| S66 | F | 70 | 2  | Left      | Med-EI   | Flex28                    |
| S67 | M | 61 | 0  | Right     | Med-EI   | FlexSoft                  |
| S68 | M | 60 | 0  | Left      | Cochlear | CI522                     |
| S69 | M | 61 | 0  | Left      | Med-EI   | Standard                  |
| S70 | M | 72 | 2  | Bilateral | Med-EI   | Standard (R & L)          |
| S71 | F | 79 | 0  | Left      | Med-EI   | Flex28                    |
| S72 | M | 57 | 0  | Right     | Cochlear | CI522                     |
| S73 | M | 76 | 5  | Right     | Med-EI   | Flex28                    |
| S74 | F | 70 | 14 | Bilateral | Cochlear | CI24RECA (R & L)          |

---
